# Supplementary material for: A Hydrate Reservoir Renovation Device and Its Application in Nitrogen Bubble Fracturing
Source: Copernicus journal article supplement (doi:10.5194/egusphere-2023-1141), 2023-08-02
Supplement: Supplementary file [file egusphere-2023-1141-CC3-supplement.pdf]

Dear Editors,

We just completed a manuscript entitled "**A Hydrate Reservoir Renovation Device and Its Application in Nitrogen Bubble Fracturing**", now submit it to your **Geoscientific Instrumentation, Methods and Data Systems**.

No conflict of interest exists in the submission of this manuscript, and the manuscript is approved by all authors for publication. I would like to declare on behalf of my co-author that the work described was original research that has not been published previously and is not under consideration for publication elsewhere, in whole or in part. The authors listed (Jingsheng Lu, Yuanxin Yao, Dongliang Li, Jinhai Yang, Deqing Liang, Yiqun Zhang, Decai Lin and Kunlin Ma) have approved the manuscript that is enclosed.

We would like to thank the editor and the reviewers for their careful review of their manuscript. We have revised the manuscript in accordance with the reviewers' comments. The major changes are figures, introduction and results, the blue letter mark the major changes. In addition, our point-by-point response to the reviewers' comments is attached.

Further, we believe that this paper will be of interest to the readership and attract the citations of your journal.

Corresponding Author: Prof. Dongliang LI  
Guangzhou Institute of Energy Conversion, Chinese Academy of Sciences  
No.2, Nengyuan Rd, Tianhe District, Guangzhou, 510640, China  
E-Mail: [lidl@ms.giec.ac.cn](mailto:lidl@ms.giec.ac.cn)

If you have any other questions, please don't hesitate to contact me.

Looking forward to your positive response.

Best regards,  
Prof.LI Dongliang

**RC1:** '[Comment on egusphere-2023-1141](#)', Anonymous Referee #1, 12 Jan 2024 [reply](#)

The authors developed an experimental apparatus which was applied to analyze the hydraulic fracture mechanism in synthesized hydrate bearing sediments. They discussed the basic principles of this apparatus and gave the preliminary experimental data. Generally speaking, the design concept of the apparatus is novel and practical. I have several questions for the authors to clarify.

1. Please check your language with a native speaker.

[Thank you. We checked our language by a native speaker. The changes were marked by blue.](#)

2. The labels of Figure 3 and Figure 4 can be more clearly.

[Thank you. We updated the size of labels in Figure 3 and 4.](#)

3. The conclusion can be slightly expanded, and include some specific future work as well. This system may be applied to CO<sub>2</sub> geology sequestered in the saline aquifer.

[We added: This facility is also applied to CO<sub>2</sub> geology sequestered in the saline aquifer, which can visual of the saline aquifer during the CO<sub>2</sub> injected and sequestered.](#)

**RC2:** '[Comment on egusphere-2023-1141](#)', Anonymous Referee #2, 24 Jan 2024 [reply](#)

This paper discussed the instruments for reservoir reformation behaviour of the hydrate-bearing sediments. Hydraulic fracturing is one of the useful stimulation technologies widely applied to the “shale gas revolution”, it is also significant to enhance production technology for gas hydrate. Overall, the manuscript is well-organized. But I also find several points and parts that need to be revised to enhance the audience reach prior to acceptance for publication. The detailed comments are as follows:

1. The language of this manuscript can be further improved to enrich the audience.

[Thank you. We checked our language by a native speaker. The changes were marked by blue.](#)

2. There are some small issues and typos (capitalization, double punctuations). Please make a thorough check.

[Thank you. We checked the whole paper. The changes were marked by blue.](#)

3. Some legend of figures are too small, it is hard to read in paper.

[Thank you. We updated the size of labels in Figure 3 and 4.](#)

4. What is the temperature of the pre-cold water, and whether it will affect the hydrate dissociation during the permeability test?

[Thank you. The temperature of the pre-cold water is 277 K. The affect of hydrate dissociation during the permeability test is not discussed in this experimental facility paper.](#)

5. Whether the difference between the two synthesized hydrate samples will affect the properties of the reservoir?

[Thank you. The heterogeneous of HBS sample will affect the properties of the reservoir, this is the common problem during HBS tests.](#)

6.The change of hydrate reservoir permeability after hydraulic fracturing is not described in the paper?

Thank you for your comments. We added:

### 3.3 Permeability test in hydrate-bearing sediments

The permeability of hydrate-bearing sediments are tested by Darcy's law. The permeability  $K$  is calculated from the flow rate  $q$ , cross-sectional area  $A$ , pressure differential  $\Delta P$ , viscosity  $\mu$ , and the space coordinate in the flow direction  $L$ . The inject pressure  $P_1$  is pumped water by the constant-flux pump, while the the outlet pressure  $P_2$  is measured. The pressure differential  $\Delta P$  will decrease after the operation of hydraulic facture, so the permeability  $K$  will increase in HBS.

$$K = \frac{q\mu L}{A\Delta P} \quad (1)$$

$$\Delta P = P_1 - P_2 \quad (2)$$

**RC3:** '[Comment on egusphere-2023-1141](#)', Anonymous Referee #3, 16 Feb 2024 [reply](#)

The manuscript developed an experimental facility and conducted experiments to investigate the hydraulic fracture mechanism in synthesized HBS, which is a commendable endeavor and of significant importance for the research on methane recovery from gas hydrate reservoirs. However, a few aspects need to be addressed to improve the quality of the manuscript.

In Figure 7, the temperature curves and the corresponding axis are missing.

A: Thank you for your comments. We show the temperature in Figure 9.

The author should explain the method they use to measure the permeability of the sediments before and after hydraulic fracture. This detail is crucial for understanding the experimental procedure and interpreting the results accurately.

A: Thank you for your comments. We added:

### 3.3 Permeability test in hydrate-bearing sediments

The permeability of hydrate-bearing sediments are tested by Darcy's law. The permeability  $K$  is calculated from the flow rate  $q$ , cross-sectional area  $A$ , pressure differential  $\Delta P$ , viscosity  $\mu$ , and the space coordinate in the flow direction  $L$ . The inject pressure  $P_1$  is pumped water by the constant-flux pump, while the the outlet pressure  $P_2$  is measured. The pressure differential  $\Delta P$  will decrease after the operation of hydraulic facture, so the permeability  $K$  will increase in HBS.

$$K = \frac{q\mu L}{A\Delta P} \quad (1)$$

$$\Delta P = P_1 - P_2 \quad (2)$$

# A Hydrate Reservoir Renovation Device and Its Application in Nitrogen Bubble Fracturing

Jingsheng Lu<sup>1,5,6</sup>, Yuanxin Yao<sup>1,5,6</sup>, Dongliang Li<sup>1,5,6\*</sup>, Jinhai Yang<sup>2</sup>, Andy Y.F. Leung<sup>3</sup>, Deqing Liang<sup>1,5,6</sup>, Yiqun Zhang<sup>4,5</sup>, Decai Lin<sup>1,5,6</sup>, Kunlin Ma<sup>1,5,6</sup>

5 <sup>1</sup>Key Laboratory of Gas Hydrate, Guangzhou Institute of Energy Conversion, Chinese Academy of Sciences, Guangzhou 510640, China;

<sup>2</sup>Hydrates, Flow Assurance & Phase Equilibria Research Group, Institute of GeoEnergy Engineering, Heriot-Watt University, Edinburgh EH14 4AS, UK;

<sup>3</sup>Department of Civil and Environmental Engineering, The Hong Kong Polytechnic University, Hong Kong, China;

10 <sup>4</sup>China University of Petroleum, Beijing 102249, China;

<sup>5</sup>State Key Laboratory of Natural Gas Hydrate, Beijing 100028, China;

<sup>6</sup>Guangdong Provincial Key Laboratory of New and Renewable Energy Research and Development, Guangzhou 510640, China;

*Correspondence to:* Dongliang LI (ldl@ms.giec.ac.cn)

15 **Abstract.** Natural gas hydrate (GH) is a significant potential energy source due to its large reserves, wide distribution, high energy density and low pollution. However, the gas production rate of past gas hydrate production tests is much lower than the requirement of commercial gas production. Reservoir stimulation technologies like hydraulic fracture provide one potential approach to enhance gas production from GH. The reservoir reformation behaviour of the hydrate-bearing sediments (HBS), particularly sediments with a high clay content, is a complex process during a hydraulic fracturing operation, which has been

20 poorly understood and thus hardly predictable. This paper presents an experimental facility that was developed to analyze the hydraulic fracture mechanism in synthesized HBS. This facility can be used to form GH in sediments, conduct visual observation of hydraulic fracturing experiments, and measure the permeability of HBS under high pressure (up to 30 MPa) and low-temperature conditions (from 253.15 K to 323.15K). It is mainly composed of a pressure control and injection unit, a low temperature and cooling unit, a cavitation unit, a visual sapphire reactor, and a data acquisition and measurement unit. The

25 hydraulic fracture module consists of a gas cylinder, fracturing pump, hopper, proppants warehouse and valves. The sapphire reservoir chamber is applied to observe and measure the fracture of HBS during hydraulic fracturing. The permeability test module is composed of a constant-flux pump and pressure sensors, which can evaluate the permeability performance before and after hydraulic fracture in HBS. The fundamental principles of this apparatus are discussed. Some tests were performed to verify hydraulic fracture tests and permeability tests could be practically applied in the HBS exploitation.

## 30 1 Introduction

Nature gas hydrate (GH) is an ice-like crystal substance, named fire in ice, which is formed by water and gas under low temperature and high-pressure conditions(Sloan and Koh, 2007). It is largely stored in the deep-water and permafrost

sediments(Boswell, 2009). GH has been considered as a potential low-carbon energy source in the 21<sup>st</sup> century. The methods of depressurization test(Tang et al., 2007), thermal simulation test(Wang et al., 2014), inhibitor injection test(Tohidi et al., 2015), carbon dioxide replacement test(Boswell et al., 2017) and solid fluidization test(Zhou et al., 2018) are applied to GH production in the last score years ago. However, the production rate of methane in these tests cannot meet the commercial requirement, and the key factor of hydrate commercial production is daily production rates(Chen et al., 2022; Yamamoto et al., 2022). Thus, the stimulation technology of HBS should be considered to achieve an economically viable gas production rate from GH reservoirs(Wu et al., 2021).

40 Hydraulic fracturing is one of the useful stimulation technologies widely applied to the “shale gas revolution” in the last three decades, which is also investigated to enhance production technology for GH(Terzariol and Santamarina, 2021; Terzariol et al., 2017)(Figure 1). Few hydraulic fracture studies of HBS were reported recently(Sun et al., 2019; Shen et al., 2020; Yao et al., 2021; Sun et al., 2021; Zhong et al., 2020; Lv et al., 2021; Konno et al., 2016; Ito et al., 2008; Ma et al., 2022). One challenge is how to detect the fracturing ability and features of HBS under low temperature and high pressure conditions.

45 While, the weak cementation, low permeability, and high fine content behaviour of HBS may lead to sand production(Lu et al., 2019), wellbore collapse and formation instability(Wu et al., 2019; Li et al., 2016; Wu et al., 2023b) during the fracturing stimulation operation. Although the innovative experimental apparatus for sand production(Lu et al., 2021a, 2018), cavitating jet(Zhang et al., 2020), mechanical behaviour (Seol et al., 2019; Spangenberg et al., 2020; Li et al., 2019) and kinetics behaviour (Masoudi et al., 2019) of HBS were developed, it is still hard to evaluate the fracturing performance (like fracture generation, growth and determination) in HBS. Meanwhile, proppants are widely applied in hydraulic fracture fluids to increase the permeability of unconventional reservoirs(Ahmed Hafez Abdelaziz, 2020; Wang et al., 2023a, b). The performance of proppants in HBS also a key factor of the stimulation technology. Furthermore, the fractures of HBS may trigger submarine slope failure and seafloor destabilization during the GH natural dissolution by global warming and marine salinity changes(Hassanpouryouzband et al., 2020). It is significant to study the fracture initiation and propagation mechanism in HBS

50 and how the fractures respond to the changes in the sedimentary properties and temperature and pressure conditions during hydraulic stimulation and, exploitation as well as the natural dissolution process.

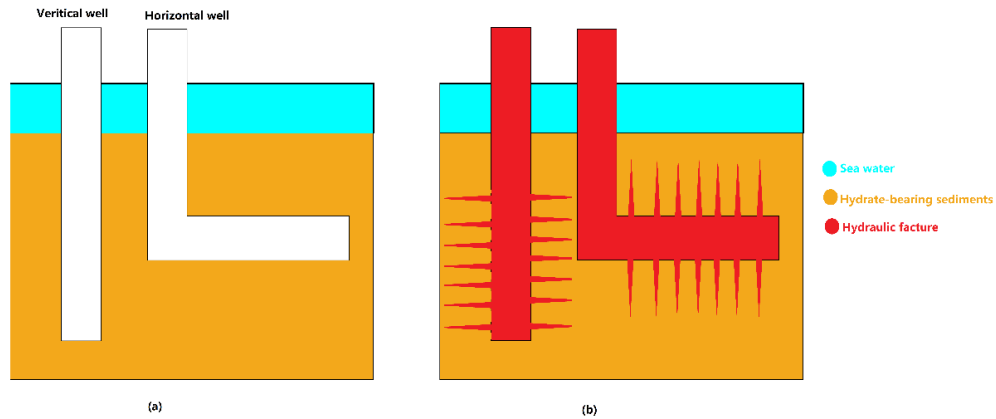

**Figure 1 Schematic diagrams of (a) hydrate-bearing sediment exploitation in a vertical well and a horizontal well (b) hydraulic fracture in HBS**

60 However, the expensive cost of field tests and restriction of numerical simulation leads to the laboratory hydraulic fracture of HBS as the best option (Tang et al., 2007). To study the ability of stimulation using hydraulic fracture in HBS, a novel experimental apparatus that consists of a set of hydraulic fracture hydrate equipment was designed and developed. It was successfully used to study the ability and feature of the hydraulic fracture in HBS and the coupling effects of multi-field (thermo-hydro-mechanical-phase change) on GH exploitation under reservoir conditions.

## 65 2 Design focus

The marine HBS is usually buried in deep water (1200 m) with high compaction stress (10-25 MPa), high pore pressure (10-20 MPa) and low temperature (275.15-288.15 K), so the effect of high crustal stress, high pressure and low temperature on hydraulic fracture could not be ignored during the stimulation process. Three key factors should be considered in the design: (1) the HBS formation,

70 (2) in-situ hydraulic fracture tests of HBS at high pressure and low temperature, and (3) fracture visualization of HBS under in-situ conditions. The schematic configuration of the designed apparatus, which is composed of a pressure control and injection unit, a low temperature and cooling unit, a cavitation unit, a visual sapphire reactor, a data acquisition and measurement unit, is shown in Figure 2.

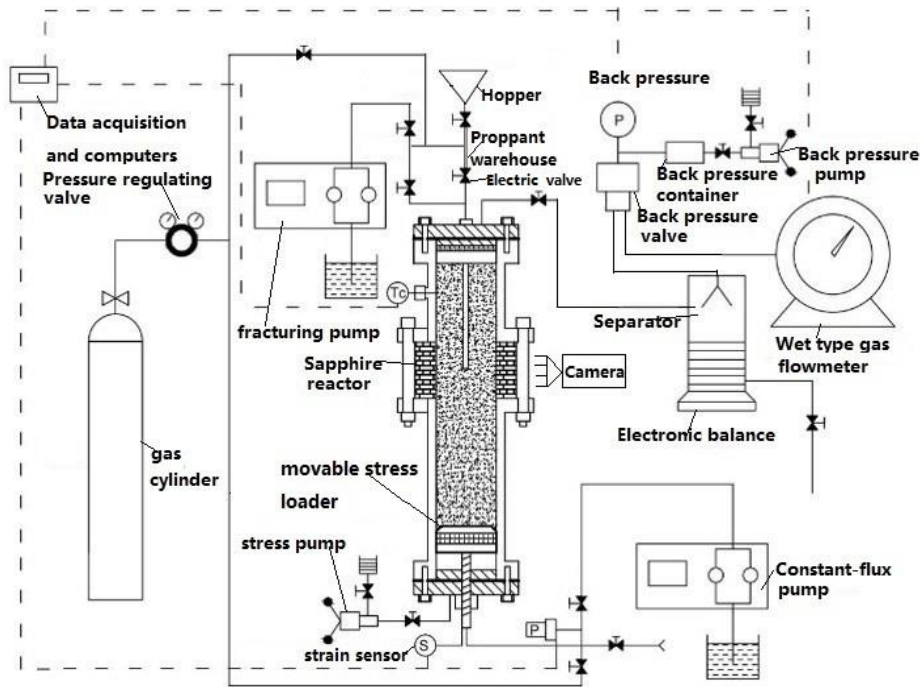

Figure 2 Schematic diagram of equipment for HBS of hydraulic fracture

75

### 2.1 Pressure and Stress Control System

In Figure 3 and Figure 4, the pressure and stress control system consists of four modules: the movable stress module (movable stress loader, stress pump and strain sensor), the hydraulic fracture module, the backpressure module (backpressure pump, backpressure container and backpressure valve), and pore pressure module (gas pressure and constant-flux pump). The pressure of the movable stress module, the hydraulic fracture module, the backpressure module, and the pore pressure module are provided by the stress pump (30 MPa), constant-flux pump (30 MPa), fracturing pump (30 MPa), backpressure pump (10 MPa) and methane gas (13 MPa), respectively. The automatic pressure relief valve is fixed to avoid pressure over the system limit. The strain sensor is assembled on a movable stress loader to measure the axial deformation (subsidence).

80

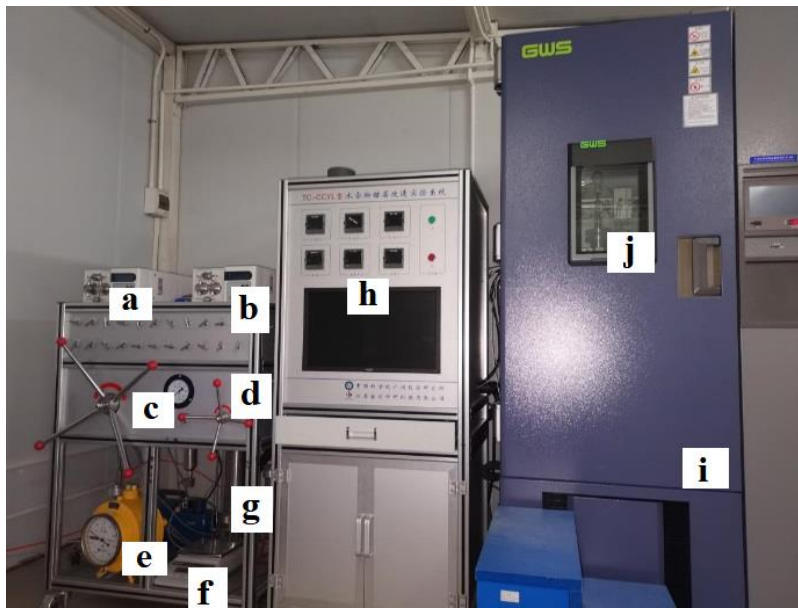

85 Figure 3 The front view of the apparatus: (a) Fracturing pump (b) Pore pressure pump (c) Overlying stress (d) Back pressure pump (e) Wet type gas flowmeter (f) Electronic balance (g) Separator (h) Control cabinet and computer (i) Air bath (j) Visual window of air bath and sapphire reactor



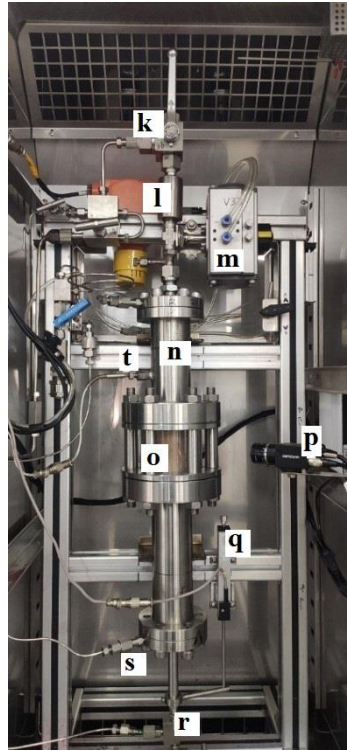

90 **Figure 4** The inside-view of the air bath:(k)Hopper valve; (l) Proppant warehouse; (m) Electric valve of proppant warehouse; (n)  
95 **Up chamber of the sapphire reactor; (o) Sapphire window of the sapphire reactor; (p) Camera; (q) Strain sensor; (r) Pore pressure  
valve and safety valve; (s) Stress valve; (t) Temperature sensor.**

## **2.2 Low temperature and air cooling system**

To control the temperature in the reactor, the programmable air bath is applied (Figure 5). The programmable air bath is  
manufactured by Guangzhou-GWS Environmental Equipment Co., Ltd, which can provide a temperature range from 253.15  
95 K to 323.15 K, and the accuracy is  $\pm 0.5$  K.

It applied the 380 V voltage for cooling power. The visual window and inside light of the programmable air bath are applied  
to the visual reactor by eye and camera. There is a temperature sensor (PT-100, the accuracy is  $\pm 0.1$  K) arranged in the middle  
of the reactor (Figure 4), which can collect the reactor temperature in [real time](#).

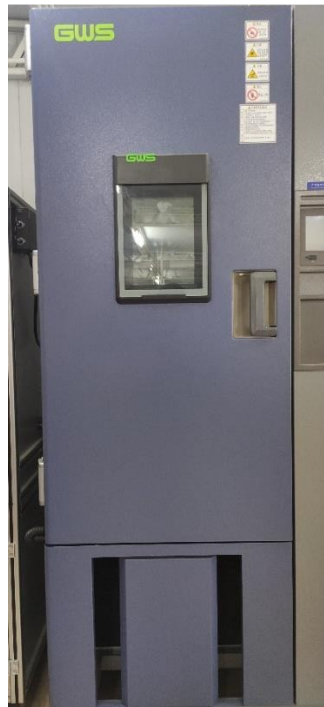

Figure 5 The programmable air bath.

100

### 2.3 Hydraulic fracture, permeability test and production system

The hydraulic fracture module consists of the gas cylinder, fracturing pump, hopper, proppants warehouse and valves. After adding the proppants into the warehouse through the hopper, the hydraulic fracture pressure increased with coloured water (fracturing fluid) and  $N_2$  gas by the fracturing pump and gas cylinder, respectively. The high-pressure hydraulic fracturing fluid with proppants flows directly through the pipe ( $\Phi$  8 mm) into the visual sapphire reactor when the electric valve of the proppants warehouse opens.

105

The permeability test module is composed of the constant-flux pump and pressure sensors. It determines the permeability of HBS before and after hydraulic fracturing through Darcy's law(Wu et al., 2023a; Lu et al., 2021b).

110

The production module is constituted of a backpressure module, separator, electronic balance and gas flowmeter. It is applied to test the production capacity of HBS after the hydraulic fracture.

### 2.4 Visual sapphire reactor

115

The visual sapphire reactor (Figure 4) is divided into three parts of the up chamber ( $\Phi$  40 mm  $\times$  140 mm, 125 ml), visual window chamber and down chamber ( $\Phi$  40 mm  $\times$  200 mm, 250 ml). The body material of the up and down chamber is stainless steel 316L with an O ring seal, which can tolerate 20 MPa. The sapphire hollow cylinder ( $\Phi$  40 mm  $\times$  60 mm, 75 ml) is applied to the visual window chamber for eye and camera monitoring.

## 2.5 Data acquisition and measurement control system

The digital acquisition and control card are applied to ensure real-time data acquisition by MOX C168H. Through the control cabinet (Figure 6), the hydrate fracturing pressure, pore injection pressure (bottom pressure), pore pressure (up pressure), production pressure (up pressure), temperature and movable stress can be displayed and collected. The gas measuring equipment is the BSD05 wet flow meter for gas monitoring (measuring range 12.5L /min,  $\pm 1\%$ ) by Krom Co.Ltd. The pressure sensor is manufactured by TraFag.Co.Ltd with a range of 30 MPa and an accuracy of 0.1%F.S.

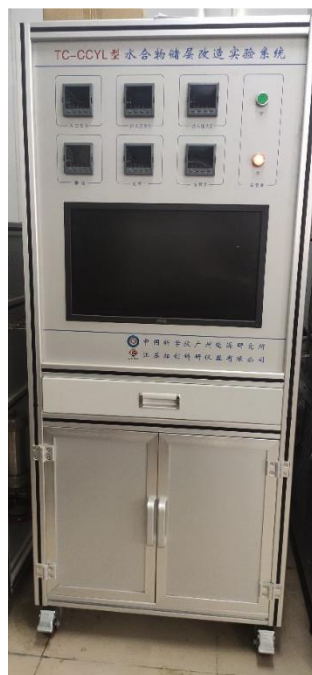

Figure 6 Control cabinet

The experimental process and the related control parameters of equipment are controlled by VB-compiled experiment measurement control software. The data of real-time acquisition are reactor chamber internal pressure, production pressure, injection pressure, movable pressure and other parameters. The experimental data can be output in Excel form. The software can set and control the electric valve.

## 3. EXPERIMENTAL PROCESS AND RESULTS

### 3.1 Hydrate formation

The specific experimental process is as follows:

#### (1) Sample formation:

First, the hole of the hydraulic jet pipe is coated with a thin filter paper, which is to prevent sand from entering the hydraulic jet pipe. Then sediments with a certain moisture content are put into the reactor. For the compaction of the sediments sample,

1 MPa stress is applied by the movable stress loader for 1 min. After vacuuming the system for 5 min, the methane gas was injected into the reactor with a stress loader (effective stress of no more than 1 MPa). Finally, the pore pressure and stress reached equilibrium at 10 MPa and 11 MPa, respectively. After settling down at 293.15 K for 24 h (methane, water and sediments fully mixed), the temperature of the reactor was cooled to 274.15 K. The pressure in the reactor was gradually balanced at about 72 to 144 h, while the hydrate synthesis process in the sample was fully completed by gas consumption. Here, the hydrate saturation was calculated by the Soave–Redlich–Kwong (SRK) equation.

(2) Permeability test of hydrate-bearing sediment before fracturing:

The pre-cool water was injected into the hydrate-bearing sediment from bottom to top. The free methane was released from the top and substituted by pre-cool water. Then the constant pressure difference between the two ends of the reactor was constantly adjusted to conduct the liquid seepage experiment. When the discharge rate is stable in the flowmeter, the average flow rate is applied to calculate the sediment-water permeability.

(3) Hydraulic fracturing test:

The proppants were added from the hopper to the proppant warehouse. After the permeability test and water displacement, the fracturing fluid with red colour was pumped into the proppant warehouse by the fracturing pump, and mixed with the proppants above the pore pressure (about 1 MPa). When the electric valve opened, the fracturing fluid and proppant mixture entered through the hydraulic jet pipe and breakthrough the thin filter paper and fractured the HBS. A camera recorded the fracturing process in front of the sapphire cylinder.

(4) Permeability test of hydrate-bearing sediments after fracturing:

The permeability test is conducted after fracturing as (2) tests.

The experimental tests are shown in Table 1.

**Table 1 Fracturing experiment conditions and grouping**

| Test | $S_h$ (%) | Method                   | Fluid viscosity (MPa s) | Flow rates (ml/min) | T (K) | Porosity (%) | Loader stress (MPa) |
|------|-----------|--------------------------|-------------------------|---------------------|-------|--------------|---------------------|
| 1    | 39.7      | Hydraulic fracturing     |                         |                     |       |              |                     |
| 2    | 42.2      | Nitrogen foam fracturing | 2.98                    | 1                   | 277   | 34           | 11                  |

Figure 7 shows the pressure and temperature changes during the hydrate formation process in the test. Different volumes of deionized water were added to dry sand for different hydrate saturation. The hydrate saturation was calculated by gas pressure drop via the SRK equation. The hydrate saturation of the two tests is 39.7% and 42.2%, respectively. Two different fracturing methods, namely nitrogen foam fracturing group and hydraulic fracturing group, are applied.

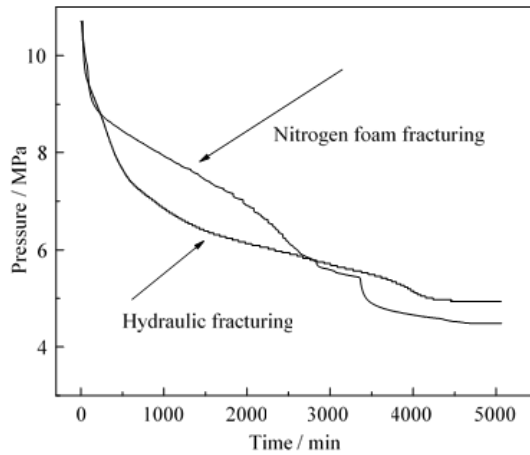

160

**Figure 7 Pressure and temperature curves during the formation of hydrate-bearing sediments**

### 3.2 Hydraulic fracture test in hydrate-bearing sediments

After hydraulic fracturing in Test 1, there is no more obvious ductile fractures were photographed around the sapphire reservoir. Therefore, the pressure changed little but did not significantly climb during hydraulic fracturing.

In Test 2, the gas fracturing group can supply a high enough pressure in the fracturing fluid to fracture the HBS at a guaranteed flow rate. As shown in Figure 8, the fracture open and closure can be seen from the sapphire windows. The expansion of fracture is from 0 mm to 0.96 mm and then reduced from 0.96 mm to 0.58 mm in 1 min. Figure 9 shows the changes in pressure and temperature in the reactor before and after fracturing. The fracture pressure of the HBS at this point is 14.42 MPa, and the extension pressure of the fracture reached 9.54 MPa. Figure 10 shows the changes in axial stress and sediment subsidence before and after the instant of fracturing. The axial stress and subsidence of HBS increase to 0.51 MPa and 0.53 mm, respectively. Then the subsidence of HBS retreats to 0.38 mm, which corresponds to fracture closure in Figure 8.

170

The hydraulic fracturing experiments verified the fracture ability of HBS.

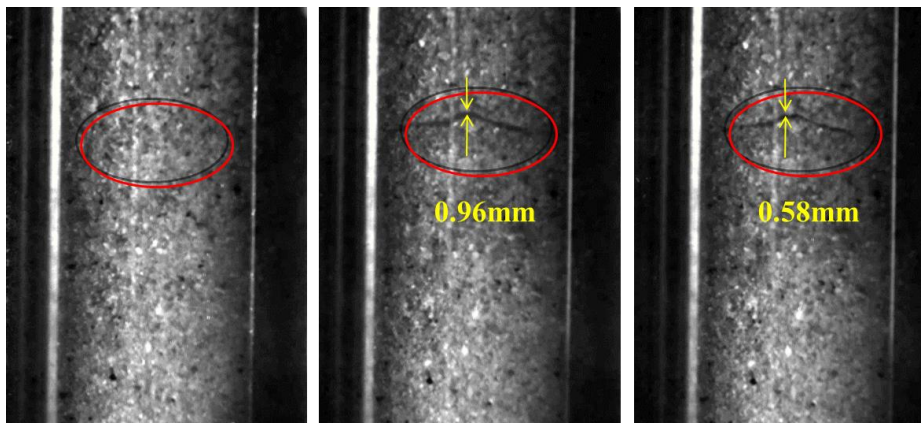

**Figure 8 Sediment nitrogen foam fracturing group burst - closure process in 1 min**

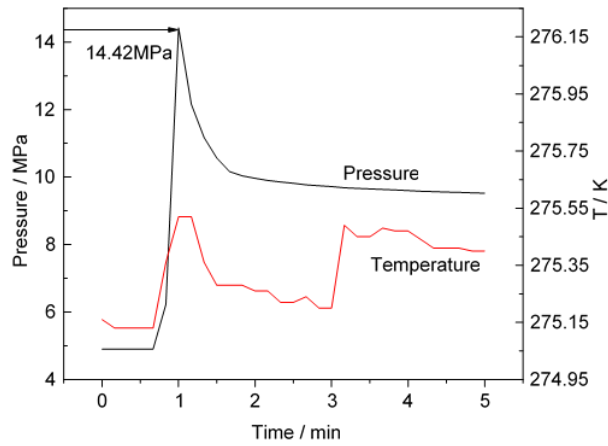

175 **Figure 9 Nitrogen foam fracturing group before and after fracturing instantaneous pressure and temperature changes**

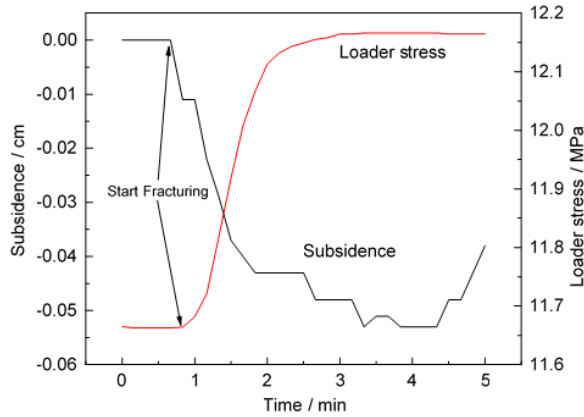

**Figure 10 Nitrogen foam fracturing group before and after fracturing instantaneous axial compression and sediment deposition**

### 3.3 Permeability test in hydrate-bearing sediments

180 The permeability of hydrate-bearing sediments are tested by Darcy's law. The permeability  $K$  is calculated from the flow rate  $q$ , cross-sectional area  $A$ , pressure differential  $\Delta P$ , viscosity  $\mu$ , and the space coordinate in the flow direction  $L$ . The inject pressure  $P_1$  and flow rate  $q$  are pumped water by the constant-flux pump, while the the outlet pressure  $P_2$  is measured. The pressure differential  $\Delta P$  will decrease after the operation of hydraulic fracture, so the permeability  $K$  will increase in HBS.

$$K = \frac{q\mu L}{A\Delta P} \quad (1)$$

$$\Delta P = P_1 - P_2 \quad (2)$$

#### 4. Conclusion

The design purpose of this apparatus is to study the hydraulic fracture mechanism of hydrate exploitation and provide support for the application of reservoir reformation technology in GH reservoirs. Two pilot experiments were conducted using liquid and gas hydraulic fluids, respectively to investigate the applicability of this system.

According to previous experience, this apparatus creative developed a visualization test platform of hydraulic fracture in HBS, with the function of movable stress, in situ GH synthesis, and deformation monitoring. The apparatus can carry out the in-situ synthesis of HBS and the tests of reservoir reformation experiments during HBS exploitation in the same environment, and provide the visual fracturing and reservoir deformation monitor. Through the pilot experiment in the early stage, the basic physical parameters of HBS fracture were collected, and the experimental steps of in-situ hydrate synthesis and fracturing in the HBS were verified.

Furthermore, this apparatus also had well commonality and flexibility. A series of visual experiments with low temperature and high pressure, such as water jetting in HBS, and CO<sub>2</sub> hydrate geology sequestration-related experiments, are planned soon. [This facility is also applied to CO<sub>2</sub> geology sequestrated in the saline aquifer, which can visual of the saline aquifer during the CO<sub>2</sub> injected and sequestered.](#)

#### Acknowledgements

This work is supported by the Science and Technology Planning Project of Guangdong Province (2021A0505030053), Natural Science Foundation of China (52004261, 52174009, 5161101020 and 51976227), Guangzhou Science and Technology Planning Project (202201010591), Guangdong Major Project of Basic and Applied Basic Research (2020B0301030003), Special project for marine economy development of Guangdong Province (GDME-2022D043), Guangdong Special Support Program (2019BT02L278), NSFC/RGC Joint Research Scheme sponsored by the National Natural Science Foundation of China and the Research Grants Council of Hong Kong (Project No. N\_PolyU518/16) and China Scholarship Council (202104910253).

### **Data availability**

The data that support the findings of this study are available from the corresponding author upon reasonable request.

### **Author contribution:**

215 JS Lu Writing - original draft, Writing - review & editing;

YX Yao: Data curation, Visualization;

DL Li: Conceptualization, Funding acquisition, Supervision, Writing - review & editing;

JH Yang: Conceptualization, Writing - review & editing;

Andy Leung: Conceptualization, Writing - review & editing;

220 DQ Liang: Conceptualization, Supervision;

YQ Zhang: Investigation, Resources, Visualization;

DC Lin & [KL Ma](#): Visualization

### **Competing interests**

The authors declare that they have no conflict of interest.

### 225 **Review statement**

This paper was edited by Rolf Müller and reviewed by Euan Nisbet and one anonymous referee.

### **References**

Ahmed Hafez Abdelaziz: Particle-laden fluid flow through porous media-Clogging, 9–12 pp., <https://doi.org/10.1016/B978-0-12-823825-7.00016-8>, 2020.

230 Boswell, R.: Is Gas Hydrate Energy Within Reach?, *Science* (80-. ), 325, 957–958, 2009.

Boswell, R., Schoderbek, D., Collett, T. S., Ohtsuki, S., White, M., and Anderson, B. J.: The Iñiġnik Sikumi field experiment, Alaska North Slope: Design, operations, and implications for CO<sub>2</sub>-CH<sub>4</sub> exchange in gas hydrate reservoirs, *Energy and Fuels*, <https://doi.org/10.1021/acs.energyfuels.6b01909>, 2017.

235 Chen, X., Lu, H., Gu, L., Shang, S., Zhang, Y., Huang, X., and Zhang, L.: Preliminary evaluation of the economic potential of the technologies for gas hydrate exploitation, *Energy*, 243, 123007, <https://doi.org/10.1016/j.energy.2021.123007>, 2022.



- Hassanpouryouzband, A., Joonaki, E., Vasheghani Farahani, M., Takeya, S., Ruppel, C., Yang, J., English, N. J., Schicks, J. M., Edlmann, K., Mehrabian, H., Aman, Z. M., and Tohidi, B.: Gas hydrates in sustainable chemistry, *Chem. Soc. Rev.*, 49, 5225–5309, <https://doi.org/10.1039/c8cs00989a>, 2020.
- Ito, T., Igarashi, A., Suzuki, K., Nagakubo, S., Matsuzawa, M., and Yamamoto, K.: Laboratory study of hydraulic fracturing behavior in unconsolidated sands for methane hydrate production, *Offshore Technol. Conf. Proc.*, 2, 969–975, <https://doi.org/10.2118/19324-ms>, 2008.
- Konno, Y., Jin, Y., Yoneda, J., Uchiumi, T., Shinjou, K., and Nagao, J.: Hydraulic fracturing in methane-hydrate-bearing sand, *RSC Adv.*, 6, 73148–73155, <https://doi.org/10.1039/c6ra15520k>, 2016.
- Li, Y., Liu, W., Zhu, Y., Chen, Y., Song, Y., and Li, Q.: Mechanical behaviors of permafrost-associated methane hydrate-bearing sediments under different mining methods, *Appl. Energy*, 162, 1627–1632, <https://doi.org/10.1016/j.apenergy.2015.04.065>, 2016.
- Li, Y., Wu, P., Liu, W., Sun, X., Cui, Z., and Song, Y.: A microfocus x-ray computed tomography based gas hydrate triaxial testing apparatus, *Rev. Sci. Instrum.*, 90, <https://doi.org/10.1063/1.5095812>, 2019.
- Lu, J., Xiong, Y., Li, D., Shen, X., Wu, Q., and Liang, D.: Experimental investigation of characteristics of sand production in wellbore during hydrate exploitation by the depressurization method, *Energies*, 11, 1673, <https://doi.org/10.3390/en11071673>, 2018.
- Lu, J., Xiong, Y., Li, D., Liang, D., Jin, G., He, Y., and Shen, X.: Experimental study on sand production and sea bottom subsidence of non-diagenetic hydrate reservoirs in depressurization production, *Mar. Geol. Quat. Geol.*, 39, 13, <https://doi.org/10.16562/j.cnki.0256-1492.2019012301>, 2019.
- Lu, J., Li, D., Liang, D., Shi, L., Zhou, X., and He, Y.: An innovative experimental apparatus for the analysis of sand production during natural gas hydrate exploitation, *Rev. Sci. Instrum.*, 92, 105110, <https://doi.org/10.1063/5.0065760>, 2021a.
- Lu, J., Li, D., Liang, D., Shi, L., He, Y., and Xiong, Y.: Experimental research on the dynamic permeability of hydrate silty-clay reservoirs during water driven and exploitation, *J. Nat. Gas Sci. Eng.*, 94, 104071, <https://doi.org/10.1016/j.jngse.2021.104071>, 2021b.
- Lv, T., Cai, J., Ding, Y., Pan, J., Chen, Z., and Li, X.: Numerical Evaluation of Long-Term Depressurization Production of a Multilayer Gas Hydrate Reservoir and Its Hydraulic Fracturing Applications, *Energy and Fuels*, <https://doi.org/10.1021/acs.energyfuels.1c04017>, 2021.
- Ma, X., Jiang, D., Sun, Y., and Li, S.: Experimental study on hydraulic fracturing behavior of frozen clayey silt and hydrate-bearing clayey silt, *Fuel*, 322, 124366, <https://doi.org/10.1016/j.fuel.2022.124366>, 2022.
- Masoudi, A., Jafari, P., Nazari, M., Kashyap, V., Eslami, B., Irajizad, P., and Ghasemi, H.: An in situ method on kinetics of gas hydrates, *Rev. Sci. Instrum.*, 90, <https://doi.org/10.1063/1.5082333>, 2019.
- Seol, Y., Lei, L., Choi, J. H., Jarvis, K., and Hill, D.: Integration of triaxial testing and pore-scale visualization of methane hydrate bearing sediments, *Rev. Sci. Instrum.*, 90, <https://doi.org/10.1063/1.5125445>, 2019.

- 270 Shen, S., Li, Y., Sun, X., Wang, L., and Song, Y.: Experimental study on the permeability of methane hydrate-bearing sediments during triaxial loading, *J. Nat. Gas Sci. Eng.*, 82, 103510, <https://doi.org/10.1016/j.jngse.2020.103510>, 2020.
- Sloan, E. D. and Koh, C. A.: *Clathrate Hydrates of Natural Gases*, 2007.
- Spangenberg, E., Heeschen, K. U., Giese, R., and Schicks, J. M.: “Ester” - A new ring-shear-apparatus for hydrate-bearing sediments, *Rev. Sci. Instrum.*, 91, <https://doi.org/10.1063/1.5138696>, 2020.
- 275 Sun, J., Ning, F., Liu, T., Liu, C., Chen, Q., Li, Y., Cao, X., Mao, P., Zhang, L., and Jiang, G.: Gas production from a silty hydrate reservoir in the South China Sea using hydraulic fracturing: A numerical simulation, *Energy Sci. Eng.*, 7, 1106–1122, <https://doi.org/10.1002/ese3.353>, 2019.
- Sun, Y., Li, S., Lu, C., Liu, S., Chen, W., and Li, X.: The characteristics and its implications of hydraulic fracturing in hydrate-bearing clayey silt, *J. Nat. Gas Sci. Eng.*, 95, 104189, <https://doi.org/10.1016/j.jngse.2021.104189>, 2021.
- 280 Tang, L. G., Li, X. Sen, Feng, Z. P., Li, G., and Fan, S. S.: Control mechanisms for gas hydrate production by depressurization in different scale hydrate reservoirs, *Energy and Fuels*, 21, 227–233, <https://doi.org/10.1021/ef0601869>, 2007.
- Terzariol, M. and Santamarina, J. C.: Multi-well strategy for gas production by depressurization from methane hydrate-bearing sediments, *Energy*, 220, 0–7, <https://doi.org/10.1016/j.energy.2020.119710>, 2021.
- 285 Terzariol, M., Goldsztein, G., and Santamarina, J. C.: Maximum recoverable gas from hydrate bearing sediments by depressurization, *Energy*, 141, 1622–1628, <https://doi.org/10.1016/j.energy.2017.11.076>, 2017.
- Tohidi, B., Anderson, R., Mozaffar, H., and Tohidi, F.: The Return of Kinetic Hydrate Inhibitors, *Energy and Fuels*, 29, 8254–8260, <https://doi.org/10.1021/acs.energyfuels.5b01794>, 2015.
- Wang, H., Wu, P., Li, Y., Liu, W., Pan, X., Li, Q., He, Y., and Song, Y.: Gas permeability variation during methane hydrate dissociation by depressurization in marine sediments, *Energy*, 263, 125749, <https://doi.org/10.1016/j.energy.2022.125749>, 2023a.
- Wang, H., Liu, W., Wu, P., Pan, X., You, Z., Lu, J., and Li, Y.: Gas recovery from marine hydrate reservoir: Experimental investigation on gas flow patterns considering pressure effect, *Energy*, 275, 127482, <https://doi.org/10.1016/j.energy.2023.127482>, 2023b.
- 295 Wang, Y., Li, X. Sen, Li, G., Huang, N. S., and Feng, J. C.: Experimental study on the hydrate dissociation in porous media by five-spot thermal huff and puff method, *Fuel*, 117, 688–696, <https://doi.org/10.1016/j.fuel.2013.09.088>, 2014.
- Wu, N., Li, Y., Wan, Y., Sun, J., Huang, L., and Mao, P.: Prospect of marine natural gas hydrate stimulation theory and technology system, *Nat. Gas Ind. B*, 8, 173–187, <https://doi.org/10.1016/j.ngib.2020.08.003>, 2021.
- Wu, P., Li, Y., Yu, T., Wu, Z., Huang, L., Wang, H., and Song, Y.: Microstructure evolution and dynamic permeability anisotropy during hydrate dissociation in sediment under stress state, *Energy*, 263, <https://doi.org/10.1016/j.energy.2022.126126>, 2023a.
- 300 Wu, Q., Dou, X., Zhao, Y., Liu, Z., and Li, Y.: Discrete element simulation of the hydrate-bearing sediments mechanical behaviors under typical hydrate dissociation patterns, 115, <https://doi.org/10.1016/j.jgsce.2023.205020>, 2023b.

- Wu, Y., Li, N., Hyodo, M., Gu, M., Cui, J., and Spencer, B. F.: Modeling the mechanical response of gas hydrate reservoirs  
305 in triaxial stress space, *Int. J. Hydrogen Energy*, 44, 26698–26710, <https://doi.org/10.1016/j.ijhydene.2019.08.119>, 2019.
- Yamamoto, K., Boswell, R., Collett, T. S., Dallimore, S. R., and Lu, H.: Review of Past Gas Production Attempts from  
Subsurface Gas Hydrate Deposits and Necessity of Long-Term Production Testing, *Energy & Fuels*, 36, 5047–5062,  
<https://doi.org/10.1021/acs.energyfuels.1c04119>, 2022.
- Yao, Y., Guo, Z., Zeng, J., Li, D., Lu, J., Liang, D., and Jiang, M.: Discrete Element Analysis of Hydraulic Fracturing of  
310 Methane Hydrate-Bearing Sediments, *Energy and Fuels*, 35, 6644–6657, <https://doi.org/10.1021/acs.energyfuels.1c00248>,  
2021.
- Zhang, Y., Zhao, K., Wu, X., Tian, S., Shi, H., Wang, W., and Zhang, P.: An innovative experimental apparatus for the  
analysis of natural gas hydrate erosion process using cavitating jet, *Rev. Sci. Instrum.*, 91, <https://doi.org/10.1063/5.0011951>,  
2020.
- 315 Zhong, X., Pan, D., Zhai, L., Zhu, Y., Zhang, H., Zhang, Y., Wang, Y., Li, X., and Chen, C.: Evaluation of the gas  
production enhancement effect of hydraulic fracturing on combining depressurization with thermal stimulation from  
challenging ocean hydrate reservoirs, *J. Nat. Gas Sci. Eng.*, 83, 103621, <https://doi.org/10.1016/j.jngse.2020.103621>, 2020.
- Zhou, S., Li, Q., Wei, C., Zhou, J., Pang, W., Yufa, H., Xin, L., Xu, L., Qiang, F., and Jiang, L.: The world’s first successful  
implementation of solid fluidization well testing and production for non-diagenetic natural gas hydrate buried in shallow  
320 layer in deep water, *Proc. Annu. Offshore Technol. Conf.*, 4, 2784–2794, <https://doi.org/10.4043/28759-ms>, 2018.
